# Supplementary material for: From pilot to a multi-site trial: refining the Early Detection of Deterioration in Elderly Residents (EDDIE +) intervention
Source: PubMed Central journal article supplement (PMC10698876; doi:10.1186/s12877-023-04491-z), 2023-12-06
Supplement: 12877_2023_4491_MOESM8_ESM.pdf [file 12877_2023_4491_MOESM8_ESM.pdf]

## The TIDieR (Template for Intervention Description and Replication) Checklist\*

Information to include when describing an intervention and the location of the information

| Item number | Item                                                                                                                                                                                                                                                                                                                | Where located**                                             | Other† (details)                                    |
|-------------|---------------------------------------------------------------------------------------------------------------------------------------------------------------------------------------------------------------------------------------------------------------------------------------------------------------------|-------------------------------------------------------------|-----------------------------------------------------|
| 1.          | <b>BRIEF NAME</b><br>Provide the name or a phrase that describes the intervention.                                                                                                                                                                                                                                  | Title Line 1-2<br>Description of components<br>Line 130-135 |                                                     |
| 2.          | <b>WHY</b><br>Describe any rationale, theory, or goal of the elements essential to the intervention.                                                                                                                                                                                                                | Line 128-130                                                | See published protocol                              |
| 3.          | <b>WHAT</b><br>Materials: Describe any physical or informational materials used in the intervention, including those provided to participants or used in intervention delivery or in training of intervention providers.<br>Provide information on where the materials can be accessed (e.g. online appendix, URL). | Table 2                                                     | Ref S. Carter et al. 2021<br>see published protocol |
| 4.          | <b>Procedures:</b> Describe each of the procedures, activities, and/or processes used in the intervention, including any enabling or support activities.                                                                                                                                                            | Table 2                                                     | Ref S. Carter et al. 2021                           |
| 5.          | <b>WHO PROVIDED</b><br>For each category of intervention provider (e.g. psychologist, nursing assistant), describe their expertise, background and any specific training given.                                                                                                                                     | Table 2                                                     |                                                     |
| 6.          | <b>HOW</b><br>Describe the modes of delivery (e.g. face-to-face or by some other mechanism, such as internet or telephone) of the intervention and whether it was provided individually or in a group.                                                                                                              | Table 2                                                     |                                                     |
| 7.          | <b>WHERE</b><br>Describe the type(s) of location(s) where the intervention occurred, including any necessary infrastructure or relevant features.                                                                                                                                                                   | Line 182-185                                                |                                                     |

|                                                                                                                                                                                                                                                                                                                                                          |                                                                                                      |
|----------------------------------------------------------------------------------------------------------------------------------------------------------------------------------------------------------------------------------------------------------------------------------------------------------------------------------------------------------|------------------------------------------------------------------------------------------------------|
| <p><b>WHEN and HOW MUCH</b></p> <p>8. Describe the number of times the intervention was delivered and over what period of time including the number of sessions, their schedule, and their duration, intensity or dose.</p>                                                                                                                              | <p><u>Table 2</u></p>                                                                                |
| <p><b>TAILORING</b></p> <p>9. If the intervention was planned to be personalised, titrated or adapted, then describe what, why, when, and how.</p>                                                                                                                                                                                                       | <p><u>Additional File 6</u></p>                                                                      |
| <p><b>MODIFICATIONS</b></p> <p>10.* If the intervention was modified during the course of the study, describe the changes (what, why, when, and how).</p>                                                                                                                                                                                                | <p><u>Additional File 7</u></p>                                                                      |
| <p><b>HOW WELL</b></p> <p>11. Planned: If intervention adherence or fidelity was assessed, describe how and by whom, and if any strategies were used to maintain or improve fidelity, describe them.</p> <p>12.* Actual: If intervention adherence or fidelity was assessed, describe the extent to which the intervention was delivered as planned.</p> | <p><u>Published Process Evaluation Protocol</u></p> <p><u>See reference 10 Bracci et al 2023</u></p> |

\*\* **Authors** - use N/A if an item is not applicable for the intervention being described. **Reviewers** - use '?' if information about the element is not reported/not sufficiently reported.

† If the information is not provided in the primary paper, give details of where this information is available. This may include locations such as a published protocol or other published papers (provide citation details) or a website (provide the URL).

# If completing the TIDieR checklist for a protocol, these items are not relevant to the protocol and cannot be described until the study is complete.

\* We strongly recommend using this checklist in conjunction with the TIDieR guide (see [www.equator-network.org](http://www.equator-network.org)) which contains an explanation and elaboration for each item.

\* The focus of TIDieR is on reporting details of the intervention elements (and where relevant, comparison elements) of a study. Other elements and methodological features of studies are covered by other reporting statements and checklists and have not been duplicated as part of the TIDieR checklist. When a **randomised trial** is being reported, the TIDieR checklist should be used in conjunction with the CONSORT statement (see [www.consort-statement.org](http://www.consort-statement.org)) as an extension of **Item 5 of the CONSORT 2010 Statement**. When a **clinical trial protocol** is being reported, the TIDieR checklist should be used in conjunction with the SPIRIT statement as an extension of **Item 11 of the SPIRIT 2013 Statement** (see [www.equator-network.org](http://www.equator-network.org)). For alternate study designs, TIDieR can be used in conjunction with the appropriate checklist for that study design (see [www.equator-network.org](http://www.equator-network.org)).
